# Supplementary figures and images for: Domain-specific physical activity and sedentary behaviour in relation to colon and rectal cancer risk: a systematic review and meta-analysis
Source: Oxford University Press journal article supplement (doi:10.1093/ije/dyx137), 2017-07-04

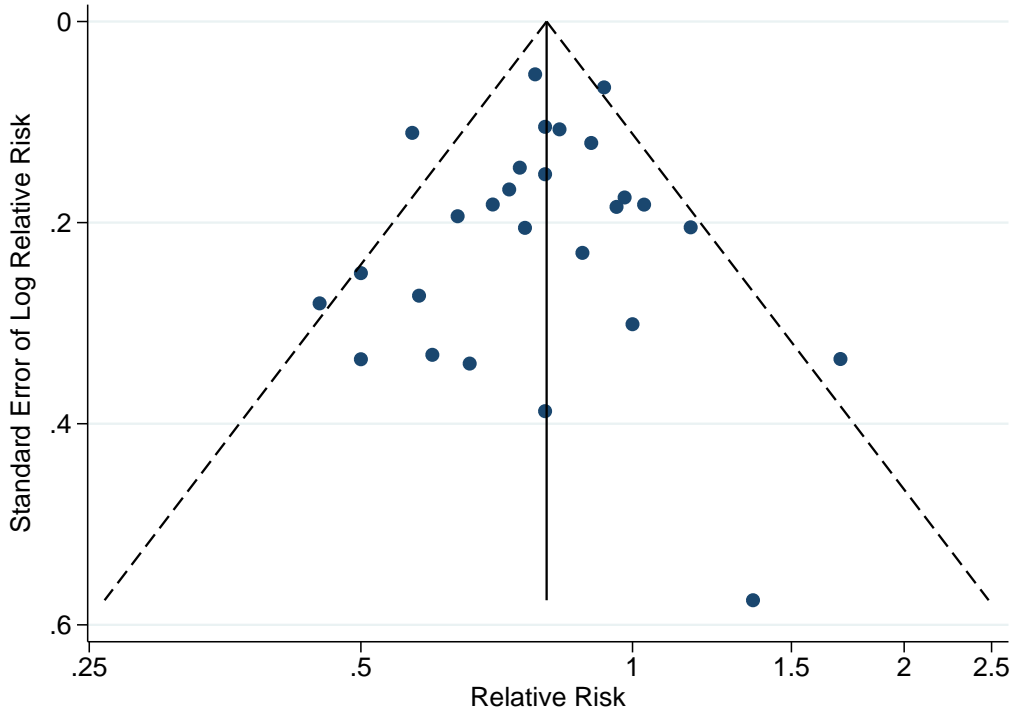

Supplement: supplementary_figure1_dyx137.pdf [file supplementary_figure1_dyx137.pdf]

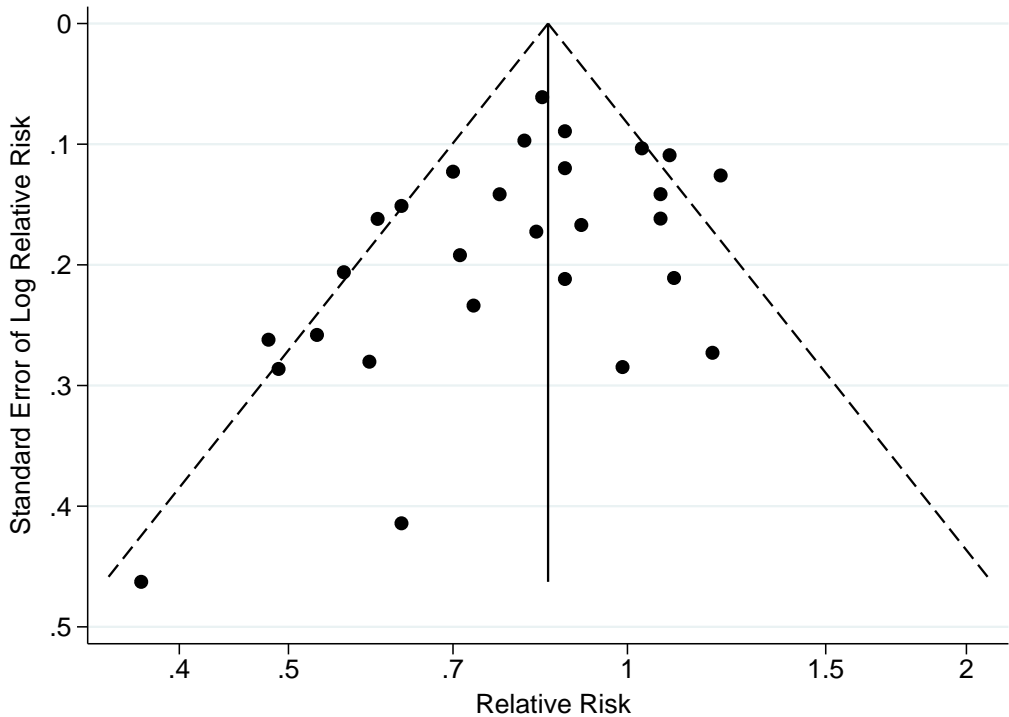

Supplement: supplementray_figure_2_dyx137.pdf [file supplementray_figure_2_dyx137.pdf]
